# Supplementary material for: Body mass index influences the plasma glucose concentration during iatrogenic hypoglycemia in people with type 2 diabetes mellitus: a cross-sectional study
Source: PeerJ. 2018 Feb 15;6:e4348. doi: 10.7717/peerj.4348 (PMC5816962; doi:10.7717/peerj.4348)
Supplement: Data S1 [file peerj-06-4348-s001.xlsx]

## Sheet: 工作表1
Patient ID	Age	Gender	Weight (kilograms)	Height (meters)	Body mass index (kg/m2)	Glycated hemoglobin A1C (%)	Creatinine (mg/dL)	Plasma glucose level at hospitalization (mg/dL)	Length of stay (days)	Serum potassium (meq/L)	Duration of diabetes (years)	Sulfonylurea	Insulin
1	63	Woman	45	1.49	20.2694	6.9	0.71	20	8	2.2	7	0	1
2	77	Woman	60	1.55	24.974	7.6	0.52	23	14	3.7	17	0	1
3	81	Man	64	1.7	22.1453	7.9	1.77	31	4	3.2	15	1	0
4	91	Man	60	1.75	19.5918	6.9	1.36	20	12	3.7	2	0	0
5	63	Woman	59	1.55	24.5578	6.8	2.18	28	2	3.2	16	1	0
6	83	Woman	52	1.53	22.2137	6.1	2.14	41	18	4	4	1	0
7	49	Man	70	1.66	25.4028	7.3	1.97	35	9	3.2	2	0	0
8	78	Woman	64	1.5	28.4444	7.1	1.36	36	3	3.5	1	0	0
9	70	Woman	63	1.75	20.5714	8.3	4.1	24	10	3.3	10	0	1
10	93	Woman	72	1.53	30.7574	6.1	1.03	31	9	4.4	16	1	0
11	45	Woman	97	1.56	39.8586	6.1	6.3	24	3	5	9	0	1
12	69	Woman	48	1.6	18.75	7.7	4.1	13	8	5.7	10	0	1
13	70	Woman	57	1.7	19.7232	9	2.79	19	9	3.2	10	1	1
14	82	Woman	59	1.5	26.2222	6	1.44	31	4	3.8	3	1	0
15	43	Man	66	1.7	22.8374	11.3	0.64	24	3	3.5	6	0	1
16	63	Woman	58	1.7	20.0692	6.6	0.9	22	11	4.5	4	0	1
17	77	Woman	63	1.6	24.6094	4	0.7	27	8	3.2	5	1	0
18	52	Man	80	1.73	26.7299	5.6	0.95	39	7	4.5	2	1	0
19	75	Man	56	1.5	24.8889	5.8	1.09	41	6	4	7	0	0
20	77	Man	54	1.5	24	6.1	0.68	52	6	3.7	7	1	0
21	71	Woman	93	1.56	38.215	7.9	1.64	40	8	4.8	16	0	1
22	67	Woman	45	1.5	20	5.6	3.9	14	4	3.4	7	1	0
23	94	Woman	55	1.65	20.202	5.3	0.75	19	18	5.1	12	1	0
24	77	Man	54	1.5	24	6.1	0.68	52	6	3.7	7	1	0
25	81	Man	65	1.65	23.8751	6.3	1.61	58	8	4.9	16	1	0
26	64	Man	59	1.7	20.4152	8.3	2.4	19	3	4.1	20	0	1
27	65	Man	60	1.7	20.7612	6.1	2.8	23	3	3.8	1	0	0
28	80	Woman	55	1.65	20.202	6.8	1.4	28	7	3.4	3	1	0
29	81	Man	63	1.7	21.7993	5.6	2.31	37	2	4.2	3	0	0
30	72	Woman	40	1.27	24.8	8.8	1.74	35	5	3.3	6	1	0
31	82	Woman	60	1.5	26.6667	5.6	0.54	40	2	3.5	12	1	0
32	72	Man	56	1.6	21.875	6.7	1.28	34	7	4.2	7	0	0
33	86	Man	50	1.76	16.1415	5.5	1.23	28	2	3.6	9	1	0
34	83	Woman	48	1.53	20.5049	4.8	0.78	29	4	3.8	16	0	0
35	76	Man	50	1.65	18.3655	5.6	0.77	20	2	3.2	3	1	0
36	79	Woman	68	1.5	30.2222	6.3	2	34	5	3.5	16	0	1
37	72	Man	72	1.68	25.5102	6.9	2.1	33	5	3.1	4	1	0
38	89	Woman	52	1.62	19.8141	5.8	1.3	29	3	3.5	4	0	0
39	66	Man	62	1.62	23.6244	5.6	1.3	50	10	3.9	8	1	0
40	55	Man	60	1.7	20.7612	7.1	0.69	36	4	3	4	1	0
41	38	Woman	41	1.56	16.8475	5.1	0.71	35	3	3.3	5	0	1
42	73	Woman	55	1.52	23.8054	7.2	1.91	65	15	4	12	1	0
43	54	Man	75	1.67	26.8923	6.5	8.3	61	1	4.4	15	1	1
44	75	Man	78	1.65	28.6501	5.8	5.2	46	4	5.8	7	1	0
45	83	Man	58	1.53	24.7768	5.8	2.4	25	2	4.1	21	1	0
46	68	Man	53	1.7	18.3391	5.7	0.67	33	4	3.5	5	1	0
47	94	Woman	41	1.5	18.2222	5.9	1.54	28	3	3.9	10	1	0
48	76	Man	60	1.56	24.6548	5.9	2.38	21	3	4.9	4	1	0
49	74	Woman	70	1.5	31.1111	5.7	5.7	28	7	3.4	6	0	1
50	83	Woman	56	1.7	19.3772	5.4	3.2	39	6	5.2	6	0	1
51	60	Woman	44	1.5	19.5556	6.3	0.55	44	16	3.2	3	1	0
52	92	Woman	38	1.5	16.8889	5.8	0.64	38	3	3.1	16	1	0
53	67	Woman	41	1.53	17.5146	6.6	1.15	22	7	4.9	5	1	0
54	68	Man	59	1.63	22.2063	6.7	0.69	50	3	2.2	3	1	0
55	82	Man	70	1.6	27.3438	6.7	1.74	25	5	5.2	12	1	0
56	91	Woman	35	1.5	15.5556	6.1	0.76	32	6	1.9	12	1	0
57	94	Woman	46	1.56	18.902	6.9	1.28	22	14	5.2	4	1	0
58	74	Woman	72	1.55	29.9688	6.9	0.76	58	3	3.5	16	0	1
59	81	Man	68	1.7	23.5294	5.5	1.2	60	9	2.4	7	1	0
60	82	Man	58	1.7	20.0692	8.1	1.8	37	4	2.7	6	1	0
61	91	Woman	51	1.51	22.3674	5.8	1.75	35	3	2.8	10	1	0
62	55	Man	56	1.62	21.3382	9.3	0.68	22	10	3.4	11	1	0
63	79	Man	53	1.57	21.5019	6.3	1.18	40	4	4.3	16	0	1
64	84	Woman	51	1.5	22.6667	6.5	1.23	56	14	3.1	4	0	0
65	81	Woman	77	1.5	34.2222	6.7	1.25	35	3	4.5	12	1	0
66	56	Woman	59	1.55	24.5578	7.5	2.11	31	3	4.2	8	1	0
67	73	Woman	76	1.55	31.6337	5.7	0.7	36	2	2.7	13	1	0
68	67	Woman	55	1.51	24.1217	6.6	3.8	45	4	3.6	10	0	1
69	72	Woman	66	1.5	29.3333	8	0.94	61	2	4.2	4	1	0
70	94	Woman	41	1.5	18.2222	5.8	1.97	28	3	3.2	9	1	0
71	65	Man	109	1.75	35.5918	7.3	6.5	25	5	3.5	15	0	1
72	86	Woman	50	1.54	21.0828	6.5	3.7	29	4	5	8	1	0
73	59	Man	49	1.55	20.3954	6	2.01	34	9	4.8	15	1	0
74	88	Woman	49	1.59	19.3821	6	3.64	37	2	3.1	6	1	0
75	63	Man	70	1.65	25.7117	7.3	2.2	31	3	5.2	8	1	0
76	88	Man	65	1.76	20.984	5.9	1.37	20	22	2.3	4	1	0
77	73	Man	60	1.65	22.0386	8.8	1.05	26	3	3.9	14	0	1
78	55	Man	56	1.62	21.3382	7.4	0.68	22	7	3.4	5	0	1
79	83	Man	49	1.65	17.9982	8.5	1.01	30	5	3.5	9	1	0
80	64	Man	69	1.75	22.5306	6.9	0.75	58	2	3.6	4	1	0
81	60	Man	74	1.67	26.5338	8.8	1.47	39	2	2.7	15	1	0
82	89	Woman	88	1.68	31.1791	6.9	1.8	36	4	3.5	11	1	0
83	88	Woman	52	1.58	20.83	7	1.18	36	3	3.9	10	1	0
84	93	Man	65	1.6	25.3906	7.8	1.7	27	23	4.8	5	1	1
85	87	Woman	44	1.48	20.0877	6.2	0.66	29	10	3.4	16	1	0
86	81	Woman	57	1.55	23.7253	6.4	0.76	43	3	3.7	16	1	0
87	88	Woman	50	1.5	22.2222	5.4	0.68	18	5	2.1	5	1	0
88	84	Man	58	1.6	22.6562	6.4	3.52	29	8	3.7	5	0	1
89	81	Woman	50	1.5	22.2222	7.4	1.34	39	3	3.2	5	1	0
90	56	Man	77	1.75	25.1429	10	0.82	17	4	3.3	14	0	1
91	69	Man	80	1.6	31.25	7	1.11	40	6	3.5	15	1	0
92	77	Man	66	1.63	24.841	6.2	0.86	30	1	3.8	8	1	0
93	86	Man	75	1.67	26.8923	6.5	1.43	39	3	3.5	3	1	0
94	80	Woman	68	1.5	30.2222	7.5	1.35	44	3	4.3	13	1	0
95	93	Man	52	1.6	20.3125	5.1	1.6	38	3	3.9	4	1	0
96	81	Man	65	1.65	23.8751	8.6	0.84	20	8	6	8	0	1
97	43	Man	47	1.7	16.263	8.2	0.69	23	7	3.7	5	0	0
98	96	Woman	38	1.4	19.3878	6.3	1.4	29	3	4.3	5	0	0
99	77	Man	53	1.55	22.0604	7.4	1.16	34	4	3.8	2	1	0
100	73	Woman	65	1.5	28.8889	7.8	2.05	38	4	4.6	5	1	0
101	87	Woman	66	1.6	25.7812	6.2	2.66	37	5	2.1	5	0	1
102	73	Woman	49	1.5	21.7778	8.6	1.7	57	6	5.7	12	1	1
103	67	Man	55	1.62	20.9572	7.6	1.72	28	1	3.4	5	1	1
104	78	Woman	70	1.75	22.8571	9	0.52	53	6	3.1	6	0	1
105	77	Woman	52	1.5	23.1111	6.3	1.8	30	8	3.8	7	1	0
106	88	Woman	70	1.6	27.3438	5.2	1.96	39	8	4.7	5	0	1
107	90	Woman	58	1.6	22.6562	6	1.42	60	7	4.4	7	0	1
